# Supplementary material
Source: PubMed Central journal article supplement (PMC4153418)
Supplement: NIHMS602934-supplement-02.pdf [file NIHMS602934-supplement-02.pdf]

| MGI build 38  | CDS Change      | PosMed          | RNA Change      | CDS Change $\cap$<br>PosMed | CDS Change $\cap$<br>RNA Change | PosMed $\cap$ RNA<br>Change | CDS Change $\cap$<br>PosMed $\cap$ RNA<br>Change |
|---------------|-----------------|-----------------|-----------------|-----------------------------|---------------------------------|-----------------------------|--------------------------------------------------|
| 1600012P17Rik | 2310009B15Rik   | <i>Abl2</i>     | 5830403L16Rik   | <i>Abl2</i>                 | 5830403L16Rik                   | <i>Adipor1</i>              | <i>Atp2b4</i>                                    |
| 1700019P21Rik | 4930523C07Rik   | <i>Acmsd</i>    | <i>Adipor1</i>  | <i>Actr3</i>                | <i>Aldh9a1</i>                  | <i>Atp2b4</i>               | <i>Btg2</i>                                      |
| 1700025G04Rik | 4930558K02Rik   | <i>Actr3</i>    | <i>Aldh9a1</i>  | <i>Adcy10</i>               | <i>Atp2b4</i>                   | <i>Btg2</i>                 | <i>Cacna1s</i>                                   |
| 1700029M03Rik | 4930562F07Rik   | <i>Adcy10</i>   | <i>Atp2b4</i>   | <i>Angptl1</i>              | <i>B3galt2</i>                  | <i>Cacna1s</i>              | <i>Ccnt2</i>                                     |
| 1700037F24Rik | 4931440L10Rik   | <i>Adipor1</i>  | <i>B3galt2</i>  | <i>Aspm</i>                 | BC003331                        | <i>Ccnt2</i>                | <i>Cdc73</i>                                     |
| 2310009B15Rik | 4933406M09Rik   | <i>Adora1</i>   | BC003331        | <i>Atp1b1</i>               | BC034090                        | <i>Cdc73</i>                | <i>Cfh</i>                                       |
| 2810025M15Rik | 5330438I03Rik   | <i>Angptl1</i>  | BC034090        | <i>Atp2b4</i>               | BC055324                        | <i>Cfh</i>                  | <i>Cntn2</i>                                     |
| 2810442N19Rik | 5430435G22Rik   | <i>Aspm</i>     | BC055324        | <i>Atp6v1g3</i>             | <i>Btg2</i>                     | <i>Cntn2</i>                | <i>Dars</i>                                      |
| 2900009J06Rik | 5730559C18Rik   | <i>Atp1b1</i>   | <i>Btg2</i>     | <i>Avpr1b</i>               | <i>Cacna1s</i>                  | <i>Creg1</i>                | <i>Dnm3</i>                                      |
| 3110040M04Rik | 5830403L16Rik   | <i>Atp2b4</i>   | <i>Cacna1s</i>  | <i>Btg2</i>                 | <i>Ccnt2</i>                    | <i>Dars</i>                 | <i>Gas5</i>                                      |
| 4930469G21Rik | A130050O07Rik   | <i>Atp6v1g3</i> | <i>Ccnt2</i>    | <i>C4bp</i>                 | <i>Cdc73</i>                    | <i>Dnm3</i>                 | <i>Ipo9</i>                                      |
| 4930523C07Rik | A930039A15Rik   | <i>Avpr1b</i>   | <i>Cdc73</i>    | <i>Cacna1s</i>              | <i>Cenpl</i>                    | <i>Gas5</i>                 | <i>Kdm5b</i>                                     |
| 4930558K02Rik | AA986860        | <i>Btg2</i>     | <i>Cenpl</i>    | <i>Ccnt2</i>                | <i>Cep350</i>                   | <i>Ipo9</i>                 | <i>Mgst3</i>                                     |
| 4930562F07Rik | <i>Abl2</i>     | <i>C4bp</i>     | <i>Cep350</i>   | <i>Cd247</i>                | <i>Cfh</i>                      | <i>Ivns1abp</i>             | <i>Nek7</i>                                      |
| 4930596I21Rik | <i>Acbd6</i>    | <i>Cacna1e</i>  | <i>Cfh</i>      | <i>Cd55</i>                 | <i>Cntn2</i>                    | <i>Kdm5b</i>                | <i>Nfasc</i>                                     |
| 4931440L10Rik | <i>Actr3</i>    | <i>Cacna1s</i>  | <i>Cntn2</i>    | <i>Cdc73</i>                | <i>Dars</i>                     | <i>Lhx4</i>                 | <i>Npl</i>                                       |
| 4933406M09Rik | <i>Adcy10</i>   | <i>Cacybp</i>   | <i>Creg1</i>    | <i>Cdk18</i>                | <i>Dcaf6</i>                    | <i>Lhx9</i>                 | <i>Nuak2</i>                                     |
| 4933409D19Rik | <i>Aldh9a1</i>  | <i>Ccnt2</i>    | <i>Dars</i>     | <i>Cfh</i>                  | <i>Ddx59</i>                    | <i>Mgst3</i>                | <i>Pfkfb2</i>                                    |
| 5330438I03Rik | <i>Angptl1</i>  | <i>Cd247</i>    | <i>Dcaf6</i>    | <i>Cfhr1</i>                | <i>Dennd1b</i>                  | <i>Nek7</i>                 | <i>Prelp</i>                                     |
| 5430435G22Rik | <i>Ankrd45</i>  | <i>Cd55</i>     | <i>Ddx59</i>    | <i>Cfhr3</i>                | <i>Dnm3</i>                     | <i>Nfasc</i>                | <i>Qsox1</i>                                     |
| 5730559C18Rik | <i>Apobec4</i>  | <i>Cdc73</i>    | <i>Dennd1b</i>  | <i>Chi3l1</i>               | <i>Dyrk3</i>                    | <i>Npl</i>                  | <i>Rassf5</i>                                    |
| 5830403L16Rik | <i>Ascl5</i>    | <i>Cdk18</i>    | <i>Dnm3</i>     | <i>Chit1</i>                | <i>Etnk2</i>                    | <i>Nuak2</i>                | <i>Rgs16</i>                                     |
| 6030442K20Rik | <i>Aspm</i>     | <i>Cfh</i>      | <i>Dyrk3</i>    | <i>Cntn2</i>                | <i>Gas5</i>                     | <i>Pbx1</i>                 | <i>Rnpep</i>                                     |
| 7420461P10Rik | <i>Astn1</i>    | <i>Cfhr1</i>    | <i>Etnk2</i>    | <i>Crb1</i>                 | <i>Ier5</i>                     | <i>Pfkfb2</i>               | <i>Slc19a2</i>                                   |
| 7530420F21Rik | <i>Atp1b1</i>   | <i>Cfhr3</i>    | <i>Fam20b</i>   | <i>Ctse</i>                 | <i>Ildr2</i>                    | <i>Pigc</i>                 | <i>Soat1</i>                                     |
| 9230116N13Rik | <i>Atp2b4</i>   | <i>Chi3l1</i>   | <i>Fam72a</i>   | <i>Daf2</i>                 | <i>Ipo9</i>                     | <i>Prdx6</i>                | <i>Sox13</i>                                     |
| A130050O07Rik | <i>Atp6v1g3</i> | <i>Chit1</i>    | <i>Gas5</i>     | <i>Dars</i>                 | <i>Kdm5b</i>                    | <i>Prelp</i>                | <i>Stx6</i>                                      |
| A230059L01Rik | <i>Avpr1b</i>   | <i>Cntn2</i>    | <i>Gm4793</i>   | <i>Dhx9</i>                 | <i>Mfsd4</i>                    | <i>Qsox1</i>                | <i>Tnr</i>                                       |
| A930039A15Rik | <i>Axdnd1</i>   | <i>Crb1</i>     | <i>Ier5</i>     | <i>Dnm3</i>                 | <i>Mgst3</i>                    | <i>Rassf5</i>               | <i>Tpr</i>                                       |
| AA986860      | <i>B3galt2</i>  | <i>Creg1</i>    | <i>Ildr2</i>    | <i>Dpt</i>                  | <i>Mpzl1</i>                    | <i>Rgs16</i>                | <i>Trove2</i>                                    |
| <i>Abl2</i>   | BC003331        | <i>Csrp1</i>    | <i>Ipo9</i>     | <i>Eif2d</i>                | <i>Nek7</i>                     | <i>Rnpep</i>                | <i>Uck2</i>                                      |
| <i>Acbd6</i>  | BC026585        | <i>Ctse</i>     | <i>Ivns1abp</i> | <i>Elk4</i>                 | <i>Nfasc</i>                    | <i>Slc19a2</i>              | <i>Xpr1</i>                                      |
| <i>Acmsd</i>  | BC034090        | <i>Cxcr4</i>    | <i>Kdm5b</i>    | <i>F13b</i>                 | <i>Nme7</i>                     | <i>Soat1</i>                | <i>Zc3h11a</i>                                   |
| <i>Actr3</i>  | BC055324        | <i>Daf2</i>     | <i>Lhx4</i>     | <i>F5</i>                   | <i>Npl</i>                      | <i>Sox13</i>                |                                                  |

| MGI build 38    | CDS Change           | PosMed          | RNA Change      | CDS Change $\cap$<br>PosMed | CDS Change $\cap$<br>RNA Change | PosMed $\cap$ RNA<br>Change | CDS Change $\cap$<br>PosMed $\cap$ RNA<br>Change |
|-----------------|----------------------|-----------------|-----------------|-----------------------------|---------------------------------|-----------------------------|--------------------------------------------------|
| <i>Adcy10</i>   | <i>Blzf1</i>         | <i>Dars</i>     | <i>Lhx9</i>     | <i>Faim3</i>                | <i>Nuak2</i>                    | <i>Srgap2</i>               |                                                  |
| <i>Adipor1</i>  | <i>Btg2</i>          | <i>Dhx9</i>     | <i>Mfsd4</i>    | <i>Fasl</i>                 | <i>Pfkfb2</i>                   | <i>Stx6</i>                 |                                                  |
| <i>Adora1</i>   | <i>C4bp</i>          | <i>Dnm3</i>     | <i>Mgst3</i>    | <i>Fcamr</i>                | <i>Plekha6</i>                  | <i>Tnr</i>                  |                                                  |
| <i>Aldh9a1</i>  | <i>Cacna1s</i>       | <i>Dpt</i>      | <i>Mpzl1</i>    | <i>Fmo3</i>                 | <i>Pm20d1</i>                   | <i>Tpr</i>                  |                                                  |
| <i>Angptl1</i>  | <i>Camsap2</i>       | <i>Eif2d</i>    | <i>Nek7</i>     | <i>Fmod</i>                 | <i>Pogk</i>                     | <i>Trove2</i>               |                                                  |
| <i>Ankrd45</i>  | <i>Ccnt2</i>         | <i>Elf3</i>     | <i>Nfasc</i>    | <i>Gas5</i>                 | <i>Ppp1r12b</i>                 | <i>Uck2</i>                 |                                                  |
| <i>Apobec4</i>  | <i>Cd247</i>         | <i>Elk4</i>     | <i>Nme7</i>     | <i>Glrx2</i>                | <i>Prelp</i>                    | <i>Xpr1</i>                 |                                                  |
| <i>Arl8a</i>    | <i>Cd55</i>          | <i>F13b</i>     | <i>Npl</i>      | <i>Glul</i>                 | <i>Qsox1</i>                    | <i>Zc3h11a</i>              |                                                  |
| <i>Arpc5</i>    | <i>Cdc73</i>         | <i>F5</i>       | <i>Nuak2</i>    | <i>Gpa33</i>                | <i>R3hdm1</i>                   |                             |                                                  |
| <i>Ascl5</i>    | <i>Cdk18</i>         | <i>Faim3</i>    | <i>Nucks1</i>   | <i>Gpr161</i>               | <i>Rabgap1l</i>                 |                             |                                                  |
| <i>Aspm</i>     | <i>Cenpl</i>         | <i>Fasl</i>     | <i>Pbx1</i>     | <i>Gpr39</i>                | <i>Ralgps2</i>                  |                             |                                                  |
| <i>Astn1</i>    | <i>Cep350</i>        | <i>Fcamr</i>    | <i>Pfkfb2</i>   | <i>Hmcn1</i>                | <i>Rasal2</i>                   |                             |                                                  |
| <i>Atp1b1</i>   | <i>Cfh</i>           | <i>Fmo3</i>     | <i>Pigc</i>     | <i>Ikbke</i>                | <i>Rassf5</i>                   |                             |                                                  |
| <i>Atp2b4</i>   | <i>Cfhr1</i>         | <i>Fmod</i>     | <i>Plekha6</i>  | <i>Il19</i>                 | <i>Rgl1</i>                     |                             |                                                  |
| <i>Atp6v1g3</i> | <i>Cfhr2</i>         | <i>Gas5</i>     | <i>Pm20d1</i>   | <i>Il20</i>                 | <i>Rgs16</i>                    |                             |                                                  |
| <i>Avpr1b</i>   | <i>Cfhr3</i>         | <i>Glrx2</i>    | <i>Pogk</i>     | <i>Ipo9</i>                 | <i>Rnpep</i>                    |                             |                                                  |
| <i>Axdnd1</i>   | <i>Chi3l1</i>        | <i>Glul</i>     | <i>Ppp1r12b</i> | <i>Kdm5b</i>                | <i>Slc19a2</i>                  |                             |                                                  |
| <i>B3galt2</i>  | <i>Chit1</i>         | <i>Gpa33</i>    | <i>Prdx6</i>    | <i>Kif14</i>                | <i>Soat1</i>                    |                             |                                                  |
| <i>BC003331</i> | <i>Cntn2</i>         | <i>Gpr161</i>   | <i>Prelp</i>    | <i>Kif21b</i>               | <i>Sox13</i>                    |                             |                                                  |
| <i>BC026585</i> | <i>Crb1</i>          | <i>Gpr37l1</i>  | <i>Qsox1</i>    | <i>Kifap3</i>               | <i>Stx6</i>                     |                             |                                                  |
| <i>BC034090</i> | <i>Ctse</i>          | <i>Gpr39</i>    | <i>R3hdm1</i>   | <i>Kiss1</i>                | <i>Tnr</i>                      |                             |                                                  |
| <i>BC055324</i> | <i>Cyb5r1</i>        | <i>Hmcn1</i>    | <i>Rabgap1l</i> | <i>Lamc1</i>                | <i>Tor3a</i>                    |                             |                                                  |
| <i>Blzf1</i>    | <i>Daf2</i>          | <i>Ikbke</i>    | <i>Rabif</i>    | <i>Lamc2</i>                | <i>Tpr</i>                      |                             |                                                  |
| <i>Btg2</i>     | <i>Dars</i>          | <i>Il10</i>     | <i>Ralgps2</i>  | <i>Lax1</i>                 | <i>Trove2</i>                   |                             |                                                  |
| <i>C4bp</i>     | <i>Dcaf6</i>         | <i>Il19</i>     | <i>Rasal2</i>   | <i>Lct</i>                  | <i>Ube2t</i>                    |                             |                                                  |
| <i>Cacna1e</i>  | <i>Ddx59</i>         | <i>Il20</i>     | <i>Rassf5</i>   | <i>Lgr6</i>                 | <i>Uchl5</i>                    |                             |                                                  |
| <i>Cacna1s</i>  | <i>Dennd1b</i>       | <i>Il24</i>     | <i>Rgl1</i>     | <i>Mdm4</i>                 | <i>Uck2</i>                     |                             |                                                  |
| <i>Cacybp</i>   | <i>Dhx9</i>          | <i>Ipo9</i>     | <i>Rgs16</i>    | <i>Mgat5</i>                | <i>Xpr1</i>                     |                             |                                                  |
| <i>Camsap2</i>  | <i>Dnm3</i>          | <i>Ivns1abp</i> | <i>Rgs8</i>     | <i>Mgst3</i>                | <i>Yod1</i>                     |                             |                                                  |
| <i>Ccdc181</i>  | <i>Dpt</i>           | <i>Kdm5b</i>    | <i>Rnpep</i>    | <i>Mr1</i>                  | <i>Zc3h11a</i>                  |                             |                                                  |
| <i>Ccnt2</i>    | <i>Dstyk</i>         | <i>Kif14</i>    | <i>Slc19a2</i>  | <i>Myoc</i>                 |                                 |                             |                                                  |
| <i>Cd247</i>    | <i>Dusp27</i>        | <i>Kif21b</i>   | <i>Soat1</i>    | <i>Ncf2</i>                 |                                 |                             |                                                  |
| <i>Cd55</i>     | <i>Dyrk3</i>         | <i>Kifap3</i>   | <i>Sox13</i>    | <i>Nek7</i>                 |                                 |                             |                                                  |
| <i>Cdc73</i>    | <i>E330020D12Rik</i> | <i>Kiss1</i>    | <i>Srgap2</i>   | <i>Nfasc</i>                |                                 |                             |                                                  |

| MGI build 38         | CDS Change     | PosMed          | RNA Change     | CDS Change $\cap$<br>PosMed | CDS Change $\cap$<br>RNA Change | PosMed $\cap$ RNA<br>Change | CDS Change $\cap$<br>PosMed $\cap$ RNA<br>Change |
|----------------------|----------------|-----------------|----------------|-----------------------------|---------------------------------|-----------------------------|--------------------------------------------------|
| <i>Cdk18</i>         | <i>Edem3</i>   | <i>Klhl12</i>   | <i>Stx6</i>    | <i>Nphs2</i>                |                                 |                             |                                                  |
| <i>Cenpl</i>         | <i>Eif2d</i>   | <i>Lamc1</i>    | <i>Tmcc2</i>   | <i>Npl</i>                  |                                 |                             |                                                  |
| <i>Cep350</i>        | <i>Elk4</i>    | <i>Lamc2</i>    | <i>Tnr</i>     | <i>Nr5a2</i>                |                                 |                             |                                                  |
| <i>Cfh</i>           | <i>Etnk2</i>   | <i>Lax1</i>     | <i>Tor3a</i>   | <i>Nuak2</i>                |                                 |                             |                                                  |
| <i>Cfhr1</i>         | <i>F13b</i>    | <i>Lct</i>      | <i>Tpr</i>     | <i>Optc</i>                 |                                 |                             |                                                  |
| <i>Cfhr2</i>         | <i>F5</i>      | <i>Lgr6</i>     | <i>Trove2</i>  | <i>Pdc</i>                  |                                 |                             |                                                  |
| <i>Cfhr3</i>         | <i>Faim3</i>   | <i>Lhx4</i>     | <i>Ube2t</i>   | <i>Pfkfb2</i>               |                                 |                             |                                                  |
| <i>Chi3l1</i>        | <i>Fam129a</i> | <i>Lhx9</i>     | <i>Uchl5</i>   | <i>Pigr</i>                 |                                 |                             |                                                  |
| <i>Chit1</i>         | <i>Fam5c</i>   | <i>Lmx1a</i>    | <i>Uck2</i>    | <i>Pla2g4a</i>              |                                 |                             |                                                  |
| <i>Cntn2</i>         | <i>Fasl</i>    | <i>Mapkapk2</i> | <i>Xpr1</i>    | <i>Pou2f1</i>               |                                 |                             |                                                  |
| <i>Colgalt2</i>      | <i>Fcamr</i>   | <i>Mdm4</i>     | <i>Yod1</i>    | <i>Prelp</i>                |                                 |                             |                                                  |
| <i>Crb1</i>          | <i>Fmo2</i>    | <i>Mgat5</i>    | <i>Zc3h11a</i> | <i>Prg4</i>                 |                                 |                             |                                                  |
| <i>Creg1</i>         | <i>Fmo3</i>    | <i>Mgst3</i>    |                | <i>Ptgs2</i>                |                                 |                             |                                                  |
| <i>Csrp1</i>         | <i>Fmo4</i>    | <i>Mir135b</i>  |                | <i>Ptpn7</i>                |                                 |                             |                                                  |
| <i>Ctse</i>          | <i>Fmo6</i>    | <i>Mir214</i>   |                | <i>Ptprc</i>                |                                 |                             |                                                  |
| <i>Cxcr4</i>         | <i>Fmo9</i>    | <i>Mr1</i>      |                | <i>Ptprv</i>                |                                 |                             |                                                  |
| <i>Cyb5r1</i>        | <i>Fmod</i>    | <i>Myoc</i>     |                | <i>Qsox1</i>                |                                 |                             |                                                  |
| <i>Daf2</i>          | <i>Gas5</i>    | <i>Myog</i>     |                | <i>Rab7l1</i>               |                                 |                             |                                                  |
| <i>Dars</i>          | <i>Glrx2</i>   | <i>Ncf2</i>     |                | <i>Rassf5</i>               |                                 |                             |                                                  |
| <i>Dars2</i>         | <i>Glul</i>    | <i>Nek7</i>     |                | <i>Rfwd2</i>                |                                 |                             |                                                  |
| <i>Dcaf6</i>         | <i>Gm10176</i> | <i>Nfasc</i>    |                | <i>Rgs1</i>                 |                                 |                             |                                                  |
| <i>Ddx59</i>         | <i>Gm10188</i> | <i>Nphs2</i>    |                | <i>Rgs13</i>                |                                 |                             |                                                  |
| <i>Dennd1b</i>       | <i>Gm10530</i> | <i>Npl</i>      |                | <i>Rgs16</i>                |                                 |                             |                                                  |
| <i>Dhx9</i>          | <i>Gm15486</i> | <i>Nr5a2</i>    |                | <i>Rgs2</i>                 |                                 |                             |                                                  |
| <i>Dnm3</i>          | <i>Gm15850</i> | <i>Nuak2</i>    |                | <i>Rnasel</i>               |                                 |                             |                                                  |
| <i>Dnm3os</i>        | <i>Gm15853</i> | <i>Optc</i>     |                | <i>Rnpep</i>                |                                 |                             |                                                  |
| <i>Dpt</i>           | <i>Gm16083</i> | <i>Pbx1</i>     |                | <i>Rxrg</i>                 |                                 |                             |                                                  |
| <i>Dstyk</i>         | <i>Gm16565</i> | <i>Pdc</i>      |                | <i>Sele</i>                 |                                 |                             |                                                  |
| <i>Dusp27</i>        | <i>Gm17678</i> | <i>Pfkfb2</i>   |                | <i>Sell</i>                 |                                 |                             |                                                  |
| <i>Dyrk3</i>         | <i>Gm4788</i>  | <i>Pigc</i>     |                | <i>Selp</i>                 |                                 |                             |                                                  |
| <i>E330020D12Rik</i> | <i>GM4845</i>  | <i>Pigr</i>     |                | <i>Serpinc1</i>             |                                 |                             |                                                  |
| <i>Edem3</i>         | <i>Gm4846</i>  | <i>Pkp1</i>     |                | <i>Slc19a2</i>              |                                 |                             |                                                  |
| <i>Eif2d</i>         | <i>Gm4847</i>  | <i>Pla2g4a</i>  |                | <i>Slc41a1</i>              |                                 |                             |                                                  |
| <i>Elf3</i>          | <i>Gm5531</i>  | <i>Pou2f1</i>   |                | <i>Soat1</i>                |                                 |                             |                                                  |

| MGI build 38   | CDS Change     | PosMed          | RNA Change | CDS Change $\cap$<br>PosMed | CDS Change $\cap$<br>RNA Change | PosMed $\cap$ RNA<br>Change | CDS Change $\cap$<br>PosMed $\cap$ RNA<br>Change |
|----------------|----------------|-----------------|------------|-----------------------------|---------------------------------|-----------------------------|--------------------------------------------------|
| <i>Elk4</i>    | <i>Gm9931</i>  | <i>Prdx6</i>    |            | <i>Sox13</i>                |                                 |                             |                                                  |
| <i>Etnk2</i>   | <i>Gorab</i>   | <i>Prelp</i>    |            | <i>Stx6</i>                 |                                 |                             |                                                  |
| <i>F13b</i>    | <i>Gpa33</i>   | <i>Prg4</i>     |            | <i>Tbx19</i>                |                                 |                             |                                                  |
| <i>F5</i>      | <i>Gpr161</i>  | <i>Prrx1</i>    |            | <i>Tmco1</i>                |                                 |                             |                                                  |
| <i>Faim3</i>   | <i>Gpr25</i>   | <i>Ptgs2</i>    |            | <i>Tmem9</i>                |                                 |                             |                                                  |
| <i>Fam129a</i> | <i>Gpr39</i>   | <i>Ptpn7</i>    |            | <i>Tnn</i>                  |                                 |                             |                                                  |
| <i>Fam163a</i> | <i>Hmcn1</i>   | <i>Ptprc</i>    |            | <i>Tnr</i>                  |                                 |                             |                                                  |
| <i>Fam20b</i>  | <i>Ier5</i>    | <i>Ptprv</i>    |            | <i>Tpr</i>                  |                                 |                             |                                                  |
| <i>Fam5b</i>   | <i>Igfn1</i>   | <i>Qsox1</i>    |            | <i>Trove2</i>               |                                 |                             |                                                  |
| <i>Fam5c</i>   | <i>Ikbke</i>   | <i>Rab711</i>   |            | <i>Uck2</i>                 |                                 |                             |                                                  |
| <i>Fam72a</i>  | <i>Il19</i>    | <i>Rassf5</i>   |            | <i>Xcl1</i>                 |                                 |                             |                                                  |
| <i>Fam78b</i>  | <i>Il20</i>    | <i>Rbbp5</i>    |            | <i>Xpr1</i>                 |                                 |                             |                                                  |
| <i>Fasl</i>    | <i>Illdr2</i>  | <i>Rc3h1</i>    |            | <i>Zc3h11a</i>              |                                 |                             |                                                  |
| <i>Fcamr</i>   | <i>Ipo9</i>    | <i>Ren1</i>     |            | <i>Zp3r</i>                 |                                 |                             |                                                  |
| <i>Fmo1</i>    | <i>Kcnt2</i>   | <i>Rfwd2</i>    |            |                             |                                 |                             |                                                  |
| <i>Fmo2</i>    | <i>Kdm5b</i>   | <i>Rgs1</i>     |            |                             |                                 |                             |                                                  |
| <i>Fmo3</i>    | <i>Kif14</i>   | <i>Rgs13</i>    |            |                             |                                 |                             |                                                  |
| <i>Fmo4</i>    | <i>Kif21b</i>  | <i>Rgs16</i>    |            |                             |                                 |                             |                                                  |
| <i>Fmo6</i>    | <i>Kifap3</i>  | <i>Rgs18</i>    |            |                             |                                 |                             |                                                  |
| <i>Fmo9</i>    | <i>Kiss1</i>   | <i>Rgs2</i>     |            |                             |                                 |                             |                                                  |
| <i>Fmod</i>    | <i>Lad1</i>    | <i>Rnasel</i>   |            |                             |                                 |                             |                                                  |
| <i>Gas5</i>    | <i>Lamc1</i>   | <i>Rnf2</i>     |            |                             |                                 |                             |                                                  |
| <i>Glr2</i>    | <i>Lamc2</i>   | <i>Rnpep</i>    |            |                             |                                 |                             |                                                  |
| <i>Glul</i>    | <i>Lax1</i>    | <i>Rxrg</i>     |            |                             |                                 |                             |                                                  |
| <i>Gm10176</i> | <i>Lct</i>     | <i>Sele</i>     |            |                             |                                 |                             |                                                  |
| <i>Gm10188</i> | <i>Lgr6</i>    | <i>Sell</i>     |            |                             |                                 |                             |                                                  |
| <i>Gm10530</i> | <i>Lmod1</i>   | <i>Selp</i>     |            |                             |                                 |                             |                                                  |
| <i>Gm10535</i> | <i>Lrrn2</i>   | <i>Serpinc1</i> |            |                             |                                 |                             |                                                  |
| <i>Gm10538</i> | <i>Lypd1</i>   | <i>Slc19a2</i>  |            |                             |                                 |                             |                                                  |
| <i>Gm15445</i> | <i>Mael</i>    | <i>Slc35f5</i>  |            |                             |                                 |                             |                                                  |
| <i>Gm15479</i> | <i>Mcm6</i>    | <i>Slc41a1</i>  |            |                             |                                 |                             |                                                  |
| <i>Gm15486</i> | <i>Mdm4</i>    | <i>Soat1</i>    |            |                             |                                 |                             |                                                  |
| <i>Gm15584</i> | <i>Mettl13</i> | <i>Sox13</i>    |            |                             |                                 |                             |                                                  |
| <i>Gm15674</i> | <i>Mfsd4</i>   | <i>Srgap2</i>   |            |                             |                                 |                             |                                                  |

| <b>MGI build 38</b> | <b>CDS Change</b> | <b>PosMed</b>  | <b>RNA Change</b> | <b>CDS Change <math>\cap</math><br/>PosMed</b> | <b>CDS Change <math>\cap</math><br/>RNA Change</b> | <b>PosMed <math>\cap</math> RNA<br/>Change</b> | <b>CDS Change <math>\cap</math><br/>PosMed <math>\cap</math> RNA<br/>Change</b> |
|---------------------|-------------------|----------------|-------------------|------------------------------------------------|----------------------------------------------------|------------------------------------------------|---------------------------------------------------------------------------------|
| <i>Gm15675</i>      | <i>Mgat5</i>      | <i>Stx6</i>    |                   |                                                |                                                    |                                                |                                                                                 |
| <i>Gm15848</i>      | <i>Mgst3</i>      | <i>Syt2</i>    |                   |                                                |                                                    |                                                |                                                                                 |
| <i>Gm15849</i>      | <i>Mir1927</i>    | <i>Tbx19</i>   |                   |                                                |                                                    |                                                |                                                                                 |
| <i>Gm15850</i>      | <i>Mpc2</i>       | <i>Tmco1</i>   |                   |                                                |                                                    |                                                |                                                                                 |
| <i>Gm15851</i>      | <i>Mpz1</i>       | <i>Tmem9</i>   |                   |                                                |                                                    |                                                |                                                                                 |
| <i>Gm15853</i>      | <i>Mr1</i>        | <i>Tnfsf18</i> |                   |                                                |                                                    |                                                |                                                                                 |
| <i>Gm16081</i>      | <i>Mybph</i>      | <i>Tnfsf4</i>  |                   |                                                |                                                    |                                                |                                                                                 |
| <i>Gm16083</i>      | <i>Myoc</i>       | <i>Tnn</i>     |                   |                                                |                                                    |                                                |                                                                                 |
| <i>Gm16548</i>      | <i>Nav1</i>       | <i>Tnni1</i>   |                   |                                                |                                                    |                                                |                                                                                 |
| <i>Gm16565</i>      | <i>Ncf2</i>       | <i>Tnr</i>     |                   |                                                |                                                    |                                                |                                                                                 |
| <i>Gm16587</i>      | <i>Nckap5</i>     | <i>Tpr</i>     |                   |                                                |                                                    |                                                |                                                                                 |
| <i>Gm16701</i>      | <i>Nek7</i>       | <i>Trove2</i>  |                   |                                                |                                                    |                                                |                                                                                 |
| <i>Gm16880</i>      | <i>Nfasc</i>      | <i>Uck2</i>    |                   |                                                |                                                    |                                                |                                                                                 |
| <i>Gm17678</i>      | <i>Nme7</i>       | <i>Vamp4</i>   |                   |                                                |                                                    |                                                |                                                                                 |
| <i>Gm19461</i>      | <i>Nphs2</i>      | <i>Xcl1</i>    |                   |                                                |                                                    |                                                |                                                                                 |
| <i>Gm19487</i>      | <i>Npl</i>        | <i>Xpr1</i>    |                   |                                                |                                                    |                                                |                                                                                 |
| <i>Gm19497</i>      | <i>Nr5a2</i>      | <i>Zc3h11a</i> |                   |                                                |                                                    |                                                |                                                                                 |
| <i>Gm19545</i>      | <i>Nuak2</i>      | <i>Zp3r</i>    |                   |                                                |                                                    |                                                |                                                                                 |
| <i>Gm19622</i>      | <i>Optc</i>       |                |                   |                                                |                                                    |                                                |                                                                                 |
| <i>Gm19627</i>      | <i>Pappa2</i>     |                |                   |                                                |                                                    |                                                |                                                                                 |
| <i>Gm19678</i>      | <i>Pdc</i>        |                |                   |                                                |                                                    |                                                |                                                                                 |
| <i>Gm19705</i>      | <i>Pfkfb2</i>     |                |                   |                                                |                                                    |                                                |                                                                                 |
| <i>Gm19918</i>      | <i>Pigr</i>       |                |                   |                                                |                                                    |                                                |                                                                                 |
| <i>Gm19995</i>      | <i>Pik3c2b</i>    |                |                   |                                                |                                                    |                                                |                                                                                 |
| <i>Gm20471</i>      | <i>Pla2g4a</i>    |                |                   |                                                |                                                    |                                                |                                                                                 |
| <i>Gm20631</i>      | <i>Plekha6</i>    |                |                   |                                                |                                                    |                                                |                                                                                 |
| <i>Gm20711</i>      | <i>Pm20d1</i>     |                |                   |                                                |                                                    |                                                |                                                                                 |
| <i>Gm4788</i>       | <i>Pogk</i>       |                |                   |                                                |                                                    |                                                |                                                                                 |
| <i>Gm4793</i>       | <i>Pou2f1</i>     |                |                   |                                                |                                                    |                                                |                                                                                 |
| <i>Gm4845</i>       | <i>Ppfia4</i>     |                |                   |                                                |                                                    |                                                |                                                                                 |
| <i>Gm4846</i>       | <i>Ppp1r12b</i>   |                |                   |                                                |                                                    |                                                |                                                                                 |
| <i>Gm4847</i>       | <i>Ppp1r15b</i>   |                |                   |                                                |                                                    |                                                |                                                                                 |
| <i>Gm5531</i>       | <i>Prelp</i>      |                |                   |                                                |                                                    |                                                |                                                                                 |
| <i>Gm5532</i>       | <i>Prg4</i>       |                |                   |                                                |                                                    |                                                |                                                                                 |

| MGI build 38    | CDS Change      | PosMed | RNA Change | CDS Change $\cap$<br>PosMed | CDS Change $\cap$<br>RNA Change | PosMed $\cap$ RNA<br>Change | CDS Change $\cap$<br>PosMed $\cap$ RNA<br>Change |
|-----------------|-----------------|--------|------------|-----------------------------|---------------------------------|-----------------------------|--------------------------------------------------|
| <i>Gm5833</i>   | <i>Prrc2c</i>   |        |            |                             |                                 |                             |                                                  |
| <i>Gm6177</i>   | <i>Ptgs2</i>    |        |            |                             |                                 |                             |                                                  |
| <i>Gm8618</i>   | <i>Ptpn7</i>    |        |            |                             |                                 |                             |                                                  |
| <i>Gm9530</i>   | <i>Ptprc</i>    |        |            |                             |                                 |                             |                                                  |
| <i>Gm9931</i>   | <i>Ptprv</i>    |        |            |                             |                                 |                             |                                                  |
| <i>Golt1a</i>   | <i>Qsox1</i>    |        |            |                             |                                 |                             |                                                  |
| <i>Gorab</i>    | <i>R3hdm1</i>   |        |            |                             |                                 |                             |                                                  |
| <i>Gpa33</i>    | <i>Rab3gap1</i> |        |            |                             |                                 |                             |                                                  |
| <i>Gpr161</i>   | <i>Rab711</i>   |        |            |                             |                                 |                             |                                                  |
| <i>Gpr25</i>    | <i>Rabgap1l</i> |        |            |                             |                                 |                             |                                                  |
| <i>Gpr3711</i>  | <i>Ralgps2</i>  |        |            |                             |                                 |                             |                                                  |
| <i>Gpr39</i>    | <i>Rasal2</i>   |        |            |                             |                                 |                             |                                                  |
| <i>Gpr52</i>    | <i>Rassf5</i>   |        |            |                             |                                 |                             |                                                  |
| <i>Hmcn1</i>    | <i>Rcsd1</i>    |        |            |                             |                                 |                             |                                                  |
| <i>ler5</i>     | <i>Rfwd2</i>    |        |            |                             |                                 |                             |                                                  |
| <i>Igfn1</i>    | <i>Rgl1</i>     |        |            |                             |                                 |                             |                                                  |
| <i>Ikbke</i>    | <i>Rgs1</i>     |        |            |                             |                                 |                             |                                                  |
| <i>Il10</i>     | <i>Rgs13</i>    |        |            |                             |                                 |                             |                                                  |
| <i>Il19</i>     | <i>Rgs16</i>    |        |            |                             |                                 |                             |                                                  |
| <i>Il20</i>     | <i>Rgs2</i>     |        |            |                             |                                 |                             |                                                  |
| <i>Il24</i>     | <i>Rgs1</i>     |        |            |                             |                                 |                             |                                                  |
| <i>lldr2</i>    | <i>Rnasel</i>   |        |            |                             |                                 |                             |                                                  |
| <i>lpo9</i>     | <i>Rnpep</i>    |        |            |                             |                                 |                             |                                                  |
| <i>Ivns1abp</i> | <i>Rxrg</i>     |        |            |                             |                                 |                             |                                                  |
| <i>Kcnt2</i>    | <i>Scyl3</i>    |        |            |                             |                                 |                             |                                                  |
| <i>Kdm5b</i>    | <i>Sec16b</i>   |        |            |                             |                                 |                             |                                                  |
| <i>Kif14</i>    | <i>Sele</i>     |        |            |                             |                                 |                             |                                                  |
| <i>Kif21b</i>   | <i>Sell</i>     |        |            |                             |                                 |                             |                                                  |
| <i>Kifap3</i>   | <i>Selp</i>     |        |            |                             |                                 |                             |                                                  |
| <i>Kiss1</i>    | <i>Serpinc1</i> |        |            |                             |                                 |                             |                                                  |
| <i>Klhdc8a</i>  | <i>Shcbp1l</i>  |        |            |                             |                                 |                             |                                                  |
| <i>Khl12</i>    | <i>Slc19a2</i>  |        |            |                             |                                 |                             |                                                  |
| <i>Khl20</i>    | <i>Slc26a9</i>  |        |            |                             |                                 |                             |                                                  |
| <i>Lad1</i>     | <i>Slc41a1</i>  |        |            |                             |                                 |                             |                                                  |

| MGI build 38     | CDS Change      | PosMed | RNA Change | CDS Change $\cap$<br>PosMed | CDS Change $\cap$<br>RNA Change | PosMed $\cap$ RNA<br>Change | CDS Change $\cap$<br>PosMed $\cap$ RNA<br>Change |
|------------------|-----------------|--------|------------|-----------------------------|---------------------------------|-----------------------------|--------------------------------------------------|
| <i>Lamc1</i>     | <i>Smg7</i>     |        |            |                             |                                 |                             |                                                  |
| <i>Lamc2</i>     | <i>Snrpe</i>    |        |            |                             |                                 |                             |                                                  |
| <i>Lax1</i>      | <i>Soat1</i>    |        |            |                             |                                 |                             |                                                  |
| <i>Lct</i>       | <i>Sox13</i>    |        |            |                             |                                 |                             |                                                  |
| <i>Lemd1</i>     | <i>Stx6</i>     |        |            |                             |                                 |                             |                                                  |
| <i>Lgr6</i>      | <i>Suco</i>     |        |            |                             |                                 |                             |                                                  |
| <i>Lhx4</i>      | <i>Swt1</i>     |        |            |                             |                                 |                             |                                                  |
| <i>Lhx9</i>      | <i>Tada1</i>    |        |            |                             |                                 |                             |                                                  |
| <i>Lmod1</i>     | <i>Tbx19</i>    |        |            |                             |                                 |                             |                                                  |
| <i>Lmx1a</i>     | <i>Tdrd5</i>    |        |            |                             |                                 |                             |                                                  |
| <i>Lrrc52</i>    | <i>Teddm1</i>   |        |            |                             |                                 |                             |                                                  |
| <i>Lrrn2</i>     | <i>Thsd7b</i>   |        |            |                             |                                 |                             |                                                  |
| <i>Lypd1</i>     | <i>Tiprl</i>    |        |            |                             |                                 |                             |                                                  |
| <i>Mael</i>      | <i>Tmco1</i>    |        |            |                             |                                 |                             |                                                  |
| <i>Map3k19</i>   | <i>Tmem163</i>  |        |            |                             |                                 |                             |                                                  |
| <i>Mapkapk2</i>  | <i>Tmem9</i>    |        |            |                             |                                 |                             |                                                  |
| <i>Mcm6</i>      | <i>Tnn</i>      |        |            |                             |                                 |                             |                                                  |
| <i>Mdm4</i>      | <i>Tnnt2</i>    |        |            |                             |                                 |                             |                                                  |
| <i>Mettl11b</i>  | <i>Tnr</i>      |        |            |                             |                                 |                             |                                                  |
| <i>Mettl13</i>   | <i>Tor1aip1</i> |        |            |                             |                                 |                             |                                                  |
| <i>Mettl18</i>   | <i>Tor1aip2</i> |        |            |                             |                                 |                             |                                                  |
| <i>Mfsd4</i>     | <i>Tor3a</i>    |        |            |                             |                                 |                             |                                                  |
| <i>Mgat5</i>     | <i>Tpr</i>      |        |            |                             |                                 |                             |                                                  |
| <i>Mgst3</i>     | <i>Trove2</i>   |        |            |                             |                                 |                             |                                                  |
| <i>Mir128-1</i>  | <i>Tsen15</i>   |        |            |                             |                                 |                             |                                                  |
| <i>Mir135b</i>   | <i>Ube2t</i>    |        |            |                             |                                 |                             |                                                  |
| <i>Mir181a-1</i> | <i>Uchl5</i>    |        |            |                             |                                 |                             |                                                  |
| <i>Mir181b-1</i> | <i>Uck2</i>     |        |            |                             |                                 |                             |                                                  |
| <i>Mir1843b</i>  | <i>Xcl1</i>     |        |            |                             |                                 |                             |                                                  |
| <i>Mir1927</i>   | <i>Xpr1</i>     |        |            |                             |                                 |                             |                                                  |
| <i>Mir199a-2</i> | <i>Yod1</i>     |        |            |                             |                                 |                             |                                                  |
| <i>Mir214</i>    | <i>Zbed6</i>    |        |            |                             |                                 |                             |                                                  |
| <i>Mir488</i>    | <i>Zbtb41</i>   |        |            |                             |                                 |                             |                                                  |
| <i>Mir5117</i>   | <i>Zc3h11a</i>  |        |            |                             |                                 |                             |                                                  |

| <b>MGI build 38</b> | <b>CDS Change</b> | <b>PosMed</b> | <b>RNA Change</b> | <b>CDS Change <math>\cap</math><br/>PosMed</b> | <b>CDS Change <math>\cap</math><br/>RNA Change</b> | <b>PosMed <math>\cap</math> RNA<br/>Change</b> | <b>CDS Change <math>\cap</math><br/>PosMed <math>\cap</math> RNA<br/>Change</b> |
|---------------------|-------------------|---------------|-------------------|------------------------------------------------|----------------------------------------------------|------------------------------------------------|---------------------------------------------------------------------------------|
| <i>Mpc2</i>         | <i>Zfp281</i>     |               |                   |                                                |                                                    |                                                |                                                                                 |
| <i>Mpz11</i>        | <i>Zfp648</i>     |               |                   |                                                |                                                    |                                                |                                                                                 |
| <i>Mr1</i>          | <i>Zp3r</i>       |               |                   |                                                |                                                    |                                                |                                                                                 |
| <i>Mroh3</i>        | <i>Zranb3</i>     |               |                   |                                                |                                                    |                                                |                                                                                 |
| <i>Mroh9</i>        |                   |               |                   |                                                |                                                    |                                                |                                                                                 |
| <i>Mrps14</i>       |                   |               |                   |                                                |                                                    |                                                |                                                                                 |
| <i>Mybph</i>        |                   |               |                   |                                                |                                                    |                                                |                                                                                 |
| <i>Myoc</i>         |                   |               |                   |                                                |                                                    |                                                |                                                                                 |
| <i>Myog</i>         |                   |               |                   |                                                |                                                    |                                                |                                                                                 |
| <i>n-R5s217</i>     |                   |               |                   |                                                |                                                    |                                                |                                                                                 |
| <i>n-R5s218</i>     |                   |               |                   |                                                |                                                    |                                                |                                                                                 |
| <i>n-R5s219</i>     |                   |               |                   |                                                |                                                    |                                                |                                                                                 |
| <i>n-R5s220</i>     |                   |               |                   |                                                |                                                    |                                                |                                                                                 |
| <i>Nav1</i>         |                   |               |                   |                                                |                                                    |                                                |                                                                                 |
| <i>Ncf2</i>         |                   |               |                   |                                                |                                                    |                                                |                                                                                 |
| <i>Nckap5</i>       |                   |               |                   |                                                |                                                    |                                                |                                                                                 |
| <i>Nek7</i>         |                   |               |                   |                                                |                                                    |                                                |                                                                                 |
| <i>Nfasc</i>        |                   |               |                   |                                                |                                                    |                                                |                                                                                 |
| <i>Nme7</i>         |                   |               |                   |                                                |                                                    |                                                |                                                                                 |
| <i>Nmnat2</i>       |                   |               |                   |                                                |                                                    |                                                |                                                                                 |
| <i>Nphs2</i>        |                   |               |                   |                                                |                                                    |                                                |                                                                                 |
| <i>Npl</i>          |                   |               |                   |                                                |                                                    |                                                |                                                                                 |
| <i>Nr5a2</i>        |                   |               |                   |                                                |                                                    |                                                |                                                                                 |
| <i>Nuak2</i>        |                   |               |                   |                                                |                                                    |                                                |                                                                                 |
| <i>Nucks1</i>       |                   |               |                   |                                                |                                                    |                                                |                                                                                 |
| <i>Optc</i>         |                   |               |                   |                                                |                                                    |                                                |                                                                                 |
| <i>Pappa2</i>       |                   |               |                   |                                                |                                                    |                                                |                                                                                 |
| <i>Pbx1</i>         |                   |               |                   |                                                |                                                    |                                                |                                                                                 |
| <i>Pdc</i>          |                   |               |                   |                                                |                                                    |                                                |                                                                                 |
| <i>Pfkfb2</i>       |                   |               |                   |                                                |                                                    |                                                |                                                                                 |
| <i>Phlda3</i>       |                   |               |                   |                                                |                                                    |                                                |                                                                                 |
| <i>Pigc</i>         |                   |               |                   |                                                |                                                    |                                                |                                                                                 |
| <i>Pigr</i>         |                   |               |                   |                                                |                                                    |                                                |                                                                                 |
| <i>Pik3c2b</i>      |                   |               |                   |                                                |                                                    |                                                |                                                                                 |



| <b>MGI build 38</b> | <b>CDS Change</b> | <b>PosMed</b> | <b>RNA Change</b> | <b>CDS Change <math>\cap</math><br/>PosMed</b> | <b>CDS Change <math>\cap</math><br/>RNA Change</b> | <b>PosMed <math>\cap</math> RNA<br/>Change</b> | <b>CDS Change <math>\cap</math><br/>PosMed <math>\cap</math> RNA<br/>Change</b> |
|---------------------|-------------------|---------------|-------------------|------------------------------------------------|----------------------------------------------------|------------------------------------------------|---------------------------------------------------------------------------------|
|                     | <i>Pkp1</i>       |               |                   |                                                |                                                    |                                                |                                                                                 |
|                     | <i>Pla2g4a</i>    |               |                   |                                                |                                                    |                                                |                                                                                 |
|                     | <i>Plekha6</i>    |               |                   |                                                |                                                    |                                                |                                                                                 |
|                     | <i>Pm20d1</i>     |               |                   |                                                |                                                    |                                                |                                                                                 |
|                     | <i>Pogk</i>       |               |                   |                                                |                                                    |                                                |                                                                                 |
|                     | <i>Pou2f1</i>     |               |                   |                                                |                                                    |                                                |                                                                                 |
|                     | <i>Ppfia4</i>     |               |                   |                                                |                                                    |                                                |                                                                                 |
|                     | <i>Ppp1r12b</i>   |               |                   |                                                |                                                    |                                                |                                                                                 |
|                     | <i>Ppp1r15b</i>   |               |                   |                                                |                                                    |                                                |                                                                                 |
|                     | <i>Prdx6</i>      |               |                   |                                                |                                                    |                                                |                                                                                 |
|                     | <i>Prelp</i>      |               |                   |                                                |                                                    |                                                |                                                                                 |
|                     | <i>Prg4</i>       |               |                   |                                                |                                                    |                                                |                                                                                 |
|                     | <i>Prrc2c</i>     |               |                   |                                                |                                                    |                                                |                                                                                 |
|                     | <i>Prrx1</i>      |               |                   |                                                |                                                    |                                                |                                                                                 |
|                     | <i>Ptgs2</i>      |               |                   |                                                |                                                    |                                                |                                                                                 |
|                     | <i>Ptpn7</i>      |               |                   |                                                |                                                    |                                                |                                                                                 |
|                     | <i>Ptprc</i>      |               |                   |                                                |                                                    |                                                |                                                                                 |
|                     | <i>Ptprv</i>      |               |                   |                                                |                                                    |                                                |                                                                                 |
|                     | <i>Qsox1</i>      |               |                   |                                                |                                                    |                                                |                                                                                 |
|                     | <i>R3hdm1</i>     |               |                   |                                                |                                                    |                                                |                                                                                 |
|                     | <i>Rab3gap1</i>   |               |                   |                                                |                                                    |                                                |                                                                                 |
|                     | <i>Rab711</i>     |               |                   |                                                |                                                    |                                                |                                                                                 |
|                     | <i>Rabgap1l</i>   |               |                   |                                                |                                                    |                                                |                                                                                 |
|                     | <i>Rabif</i>      |               |                   |                                                |                                                    |                                                |                                                                                 |
|                     | <i>Ralgps2</i>    |               |                   |                                                |                                                    |                                                |                                                                                 |
|                     | <i>Rasal2</i>     |               |                   |                                                |                                                    |                                                |                                                                                 |
|                     | <i>Rassf5</i>     |               |                   |                                                |                                                    |                                                |                                                                                 |
|                     | <i>Rbbp5</i>      |               |                   |                                                |                                                    |                                                |                                                                                 |
|                     | <i>Rc3h1</i>      |               |                   |                                                |                                                    |                                                |                                                                                 |
|                     | <i>Rcsd1</i>      |               |                   |                                                |                                                    |                                                |                                                                                 |
|                     | <i>Ren1</i>       |               |                   |                                                |                                                    |                                                |                                                                                 |
|                     | <i>Rfwd2</i>      |               |                   |                                                |                                                    |                                                |                                                                                 |
|                     | <i>Rgl1</i>       |               |                   |                                                |                                                    |                                                |                                                                                 |
|                     | <i>Rgs1</i>       |               |                   |                                                |                                                    |                                                |                                                                                 |

| MGI build 38 | CDS Change      | PosMed | RNA Change | CDS Change $\cap$<br>PosMed | CDS Change $\cap$<br>RNA Change | PosMed $\cap$ RNA<br>Change | CDS Change $\cap$<br>PosMed $\cap$ RNA<br>Change |
|--------------|-----------------|--------|------------|-----------------------------|---------------------------------|-----------------------------|--------------------------------------------------|
|              | <i>Rgs13</i>    |        |            |                             |                                 |                             |                                                  |
|              | <i>Rgs16</i>    |        |            |                             |                                 |                             |                                                  |
|              | <i>Rgs18</i>    |        |            |                             |                                 |                             |                                                  |
|              | <i>Rgs2</i>     |        |            |                             |                                 |                             |                                                  |
|              | <i>Rgs21</i>    |        |            |                             |                                 |                             |                                                  |
|              | <i>Rgs8</i>     |        |            |                             |                                 |                             |                                                  |
|              | <i>Rgs11</i>    |        |            |                             |                                 |                             |                                                  |
|              | <i>Rnasel</i>   |        |            |                             |                                 |                             |                                                  |
|              | <i>Rnf2</i>     |        |            |                             |                                 |                             |                                                  |
|              | <i>Rnpep</i>    |        |            |                             |                                 |                             |                                                  |
|              | <i>Rxrg</i>     |        |            |                             |                                 |                             |                                                  |
|              | <i>Scarna3a</i> |        |            |                             |                                 |                             |                                                  |
|              | <i>Scyl3</i>    |        |            |                             |                                 |                             |                                                  |
|              | <i>Sec16b</i>   |        |            |                             |                                 |                             |                                                  |
|              | <i>Sele</i>     |        |            |                             |                                 |                             |                                                  |
|              | <i>Sell</i>     |        |            |                             |                                 |                             |                                                  |
|              | <i>Selp</i>     |        |            |                             |                                 |                             |                                                  |
|              | <i>Serpinc1</i> |        |            |                             |                                 |                             |                                                  |
|              | <i>Sft2d2</i>   |        |            |                             |                                 |                             |                                                  |
|              | <i>Shcbp1l</i>  |        |            |                             |                                 |                             |                                                  |
|              | <i>Shisa4</i>   |        |            |                             |                                 |                             |                                                  |
|              | <i>Slc19a2</i>  |        |            |                             |                                 |                             |                                                  |
|              | <i>Slc26a9</i>  |        |            |                             |                                 |                             |                                                  |
|              | <i>Slc35f5</i>  |        |            |                             |                                 |                             |                                                  |
|              | <i>Slc41a1</i>  |        |            |                             |                                 |                             |                                                  |
|              | <i>Slc45a3</i>  |        |            |                             |                                 |                             |                                                  |
|              | <i>Smg7</i>     |        |            |                             |                                 |                             |                                                  |
|              | <i>Snord47</i>  |        |            |                             |                                 |                             |                                                  |
|              | <i>Snrpe</i>    |        |            |                             |                                 |                             |                                                  |
|              | <i>Soat1</i>    |        |            |                             |                                 |                             |                                                  |
|              | <i>Sox13</i>    |        |            |                             |                                 |                             |                                                  |
|              | <i>Srgap2</i>   |        |            |                             |                                 |                             |                                                  |
|              | <i>Stx6</i>     |        |            |                             |                                 |                             |                                                  |
|              | <i>Suco</i>     |        |            |                             |                                 |                             |                                                  |

| <b>MGI build 38</b> | <b>CDS Change</b> | <b>PosMed</b> | <b>RNA Change</b> | <b>CDS Change <math>\cap</math><br/>PosMed</b> | <b>CDS Change <math>\cap</math><br/>RNA Change</b> | <b>PosMed <math>\cap</math> RNA<br/>Change</b> | <b>CDS Change <math>\cap</math><br/>PosMed <math>\cap</math> RNA<br/>Change</b> |
|---------------------|-------------------|---------------|-------------------|------------------------------------------------|----------------------------------------------------|------------------------------------------------|---------------------------------------------------------------------------------|
|                     | <i>Swt1</i>       |               |                   |                                                |                                                    |                                                |                                                                                 |
|                     | <i>Syt2</i>       |               |                   |                                                |                                                    |                                                |                                                                                 |
|                     | <i>Tada1</i>      |               |                   |                                                |                                                    |                                                |                                                                                 |
|                     | <i>Tbx19</i>      |               |                   |                                                |                                                    |                                                |                                                                                 |
|                     | <i>Tdrd5</i>      |               |                   |                                                |                                                    |                                                |                                                                                 |
|                     | <i>Teddm1</i>     |               |                   |                                                |                                                    |                                                |                                                                                 |
|                     | <i>Tex35</i>      |               |                   |                                                |                                                    |                                                |                                                                                 |
|                     | <i>Thsd7b</i>     |               |                   |                                                |                                                    |                                                |                                                                                 |
|                     | <i>Timm17a</i>    |               |                   |                                                |                                                    |                                                |                                                                                 |
|                     | <i>Tiprl</i>      |               |                   |                                                |                                                    |                                                |                                                                                 |
|                     | <i>Tmcc2</i>      |               |                   |                                                |                                                    |                                                |                                                                                 |
|                     | <i>Tmco1</i>      |               |                   |                                                |                                                    |                                                |                                                                                 |
|                     | <i>Tmem163</i>    |               |                   |                                                |                                                    |                                                |                                                                                 |
|                     | <i>Tmem183a</i>   |               |                   |                                                |                                                    |                                                |                                                                                 |
|                     | <i>Tmem81</i>     |               |                   |                                                |                                                    |                                                |                                                                                 |
|                     | <i>Tmem9</i>      |               |                   |                                                |                                                    |                                                |                                                                                 |
|                     | <i>Tnfsf18</i>    |               |                   |                                                |                                                    |                                                |                                                                                 |
|                     | <i>Tnfsf4</i>     |               |                   |                                                |                                                    |                                                |                                                                                 |
|                     | <i>Tnn</i>        |               |                   |                                                |                                                    |                                                |                                                                                 |
|                     | <i>Tnni1</i>      |               |                   |                                                |                                                    |                                                |                                                                                 |
|                     | <i>Tnnt2</i>      |               |                   |                                                |                                                    |                                                |                                                                                 |
|                     | <i>Tnr</i>        |               |                   |                                                |                                                    |                                                |                                                                                 |
|                     | <i>Tor1aip1</i>   |               |                   |                                                |                                                    |                                                |                                                                                 |
|                     | <i>Tor1aip2</i>   |               |                   |                                                |                                                    |                                                |                                                                                 |
|                     | <i>Tor3a</i>      |               |                   |                                                |                                                    |                                                |                                                                                 |
|                     | <i>Tpr</i>        |               |                   |                                                |                                                    |                                                |                                                                                 |
|                     | <i>Trmt1l</i>     |               |                   |                                                |                                                    |                                                |                                                                                 |
|                     | <i>Trove2</i>     |               |                   |                                                |                                                    |                                                |                                                                                 |
|                     | <i>Tsen15</i>     |               |                   |                                                |                                                    |                                                |                                                                                 |
|                     | <i>Ube2t</i>      |               |                   |                                                |                                                    |                                                |                                                                                 |
|                     | <i>Ubxn4</i>      |               |                   |                                                |                                                    |                                                |                                                                                 |
|                     | <i>Uchl5</i>      |               |                   |                                                |                                                    |                                                |                                                                                 |
|                     | <i>Uck2</i>       |               |                   |                                                |                                                    |                                                |                                                                                 |
|                     | <i>Vamp4</i>      |               |                   |                                                |                                                    |                                                |                                                                                 |

| <b>MGI build 38</b> | <b>CDS Change</b> | <b>PosMed</b> | <b>RNA Change</b> | <b>CDS Change <math>\cap</math><br/>PosMed</b> | <b>CDS Change <math>\cap</math><br/>RNA Change</b> | <b>PosMed <math>\cap</math> RNA<br/>Change</b> | <b>CDS Change <math>\cap</math><br/>PosMed <math>\cap</math> RNA<br/>Change</b> |
|---------------------|-------------------|---------------|-------------------|------------------------------------------------|----------------------------------------------------|------------------------------------------------|---------------------------------------------------------------------------------|
|                     | <i>Xcl1</i>       |               |                   |                                                |                                                    |                                                |                                                                                 |
|                     | <i>Xpr1</i>       |               |                   |                                                |                                                    |                                                |                                                                                 |
|                     | <i>Yod1</i>       |               |                   |                                                |                                                    |                                                |                                                                                 |
|                     | <i>Zbed6</i>      |               |                   |                                                |                                                    |                                                |                                                                                 |
|                     | <i>Zbtb37</i>     |               |                   |                                                |                                                    |                                                |                                                                                 |
|                     | <i>Zbtb41</i>     |               |                   |                                                |                                                    |                                                |                                                                                 |
|                     | <i>Zc3h11a</i>    |               |                   |                                                |                                                    |                                                |                                                                                 |
|                     | <i>Zfp281</i>     |               |                   |                                                |                                                    |                                                |                                                                                 |
|                     | <i>Zfp648</i>     |               |                   |                                                |                                                    |                                                |                                                                                 |
|                     | <i>Zp3r</i>       |               |                   |                                                |                                                    |                                                |                                                                                 |
|                     | <i>Zranb3</i>     |               |                   |                                                |                                                    |                                                |                                                                                 |
